# Supplementary material
Source: Springer Nature journal article supplement (https://www.springermedizin.de/resource/supplementary/12933_2011_461_MOESM1_ESM.pdf/9538530)

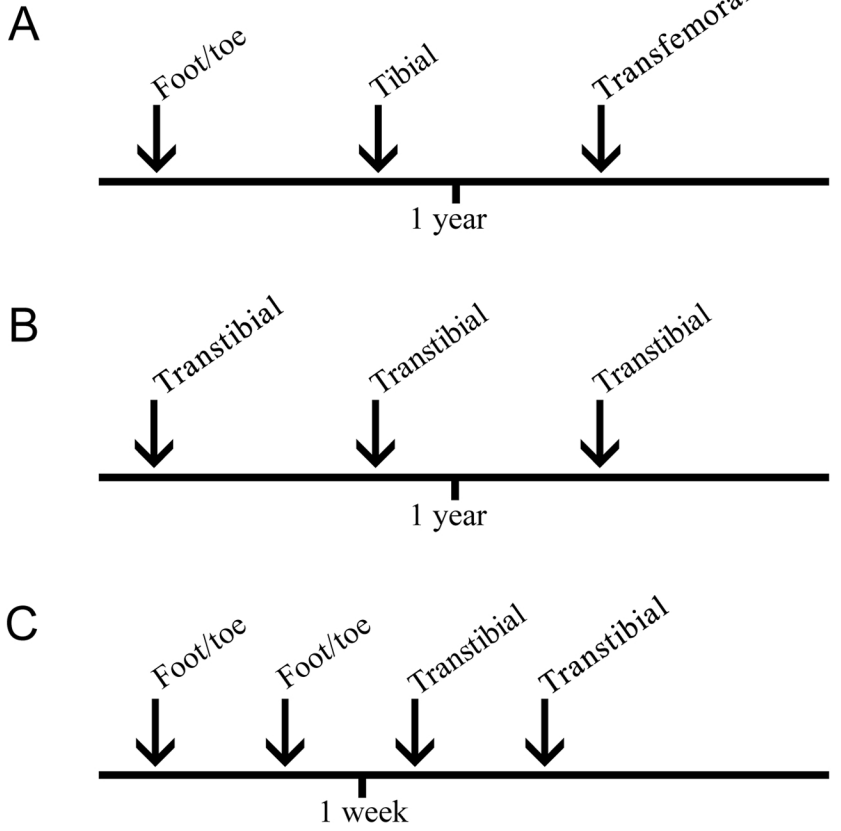

**D. Referral patterns and selection of study subjects.**

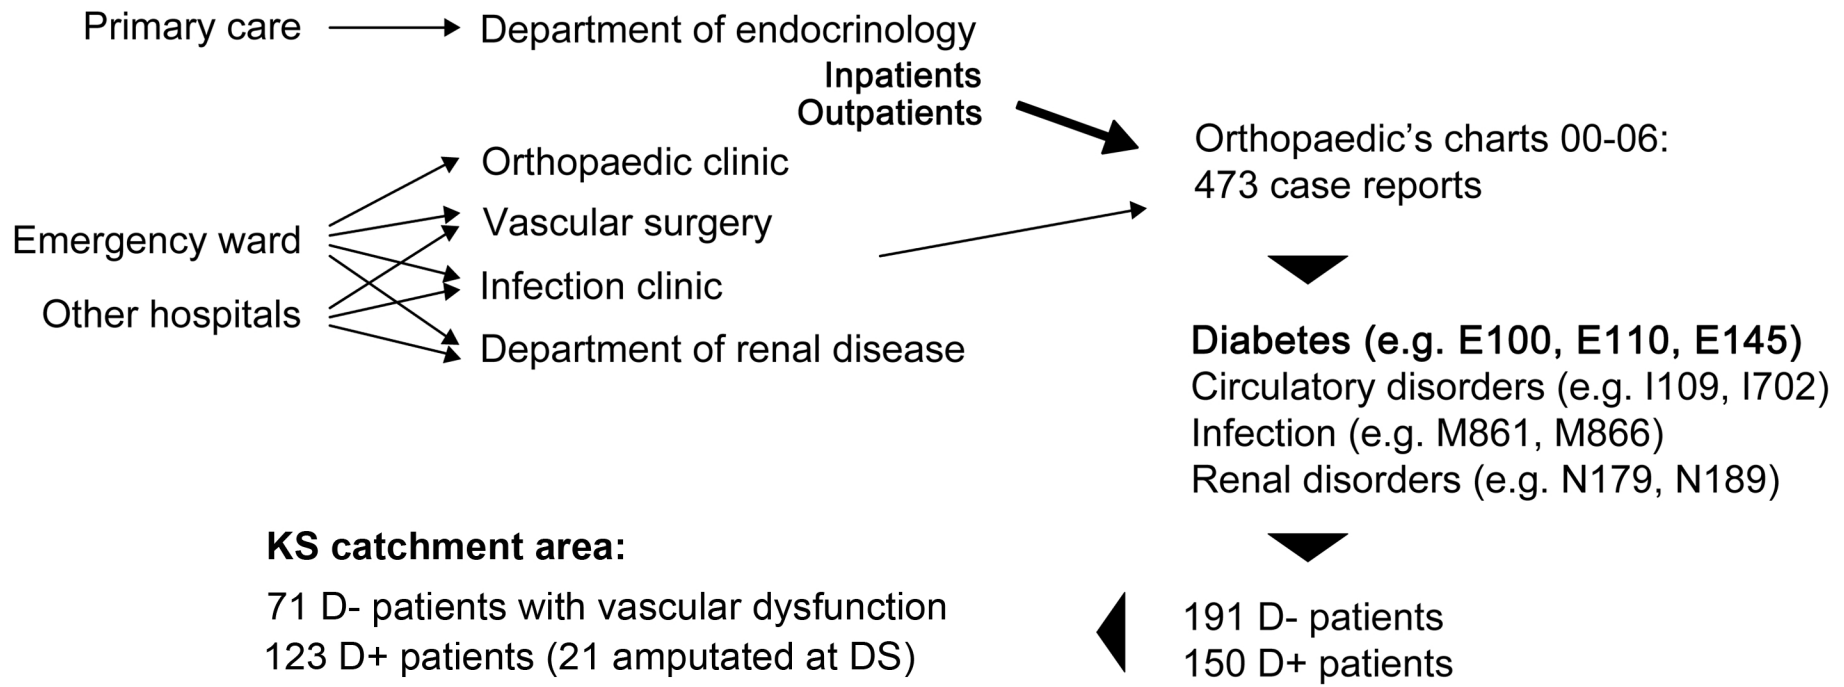

Supplement: MOESM1 [file 9538530]
